# Supplementary material for: Variation of Genes Encoding Tryptophan Catabolites Pathway Enzymes in Stroke
Source: PubMed Central journal article supplement (PMC6947300; doi:10.3390/jcm8122133), 2019-12-03
Supplement: jcm-08-02133-s001.pdf [file jcm-08-02133-s001.pdf]

**Table 1.** Haplotypes of TPH1, TPH2 and IDO1 and the risk of stroke.

| Haplotype                                                         | Control ( <i>n</i> = 107) |           | Stroke ( <i>n</i> = 107) |           | Crude OR (95% CI)   | <i>P</i> |
|-------------------------------------------------------------------|---------------------------|-----------|--------------------------|-----------|---------------------|----------|
|                                                                   | Number                    | Frequency | Number                   | Frequency |                     |          |
| c.804-7C>A – TPH1 (rs1799913) and c.803+221C>A – TPH1 (rs1800532) |                           |           |                          |           |                     |          |
| CC                                                                | 141                       | 0.33      | 149                      | 0.35      | 1.087 (0.819-1.443) | 0.564    |
| CA                                                                | 117                       | 0.27      | 111                      | 0.26      | 0.931 (0.687-1.260) | 0.643    |
| AC                                                                | 65                        | 0.15      | 1                        | 0.01      | 0.013 (0.002-0.095) | <0.0001  |
| AA                                                                | 105                       | 0.25      | 167                      | 0.39      | 1.968 (1.468-2.640) | <0.0001  |
| c.804-7C>A – TPH1 (rs1799913) and c.-173A>T – TPH1 (rs10488682)   |                           |           |                          |           |                     |          |
| AA                                                                | 42                        | 0.10      | 35                       | 0.08      | 0.819 (0.512-1.310) | 0.404    |
| CT                                                                | 142                       | 0.33      | 93                       | 0.22      | 0.559 (0.412-0.759) | 0.0002   |
| CA                                                                | 64                        | 0.15      | 57                       | 0.13      | 0.874 (0.595-1.284) | 0.492    |
| AT                                                                | 180                       | 0.42      | 243                      | 0.57      | 1.810 (1.380-2.373) | <0.0001  |
| c.804-7C>A – TPH1 (rs1799913) and c.-1668T>A – TPH1 (rs623580)    |                           |           |                          |           |                     |          |
| TT                                                                | 135                       | 0.32      | 91                       | 0.21      | 0.586 (0.431-0.800) | 0.001    |
| CA                                                                | 71                        | 0.17      | 169                      | 0.39      | 3.281 (2.382-4.519) | <0.0001  |
| AT                                                                | 167                       | 0.39      | 121                      | 0.28      | 0.616 (0.463-0.820) | 0.001    |
| AA                                                                | 55                        | 0.13      | 47                       | 0.11      | 0.837 (0.553-1.267) | 0.399    |
| c.-173A>T – TPH1 (rs10488682) and c.803+221C>A – TPH1 (rs1800532) |                           |           |                          |           |                     |          |
| AC                                                                | 71                        | 0.17      | 76                       | 0.18      | 1.086 (0.761-1.549) | 0.651    |
| AA                                                                | 35                        | 0.08      | 16                       | 0.04      | 0.436 (0.238-0.801) | 0.007    |
| TC                                                                | 187                       | 0.44      | 184                      | 0.43      | 0.972 (0.742-1.274) | 0.836    |
| TA                                                                | 135                       | 0.08      | 152                      | 0.36      | 1.195 (0.900-1.588) | 0.219    |
| c.-1668T>A – TPH1 (rs623580) and c.803+221C>A – TPH1 (rs1800532)  |                           |           |                          |           |                     |          |
| TC                                                                | 176                       | 0.41      | 91                       | 0.21      | 0.387 (0.286-0.523) | <0.0001  |
| TA                                                                | 126                       | 0.29      | 121                      | 0.28      | 0.945(0.703-1.270)  | 0.7061   |
| AC                                                                | 82                        | 0.19      | 169                      | 0.39      | 2.753 (2.021-3.750) | <0.0001  |
| AA                                                                | 44                        | 0.10      | 47                       | 0.11      | 1.077 (0.697-1.663) | 0.7394   |
| c.-173A>T – TPH1 (rs10488682) and c.-1668T>A – TPH1 (rs623580)    |                           |           |                          |           |                     |          |
| AT                                                                | 89                        | 0.21      | 29                       | 0.07      | 0.277 (0.178-0.431) | <0.0001  |
| AA                                                                | 17                        | 0.04      | 63                       | 0.15      | 4.173 (2.398-7.261) | <0.0001  |
| TT                                                                | 213                       | 0.50      | 183                      | 0.43      | 0.754 (0.576-0.987) | 0.0399   |
| TA                                                                | 109                       | 0.25      | 153                      | 0.36      | 1.628 (1.214-2.185) | 0.0011   |
| c.-1449C>A – TPH2 (rs7963803) and c.-844G>T – TPH2 (rs4570625)    |                           |           |                          |           |                     |          |
| CG                                                                | 173                       | 0.40      | 353                      | 0.82      | 6.938 (5.062-9.509) | <0.0001  |
| CT                                                                | 155                       | 0.36      | 41                       | 0.10      | 0.187 (0.128-0.272) | <0.0001  |
| AG                                                                | 53                        | 0.12      | 17                       | 0.04      | 0.293 (0.167-0.514) | <0.0001  |
| AT                                                                | 47                        | 0.11      | 17                       | 0.04      | 0.335 (0.189-0.594) | 0.0002   |
| c.-1849C>A – IDO1 (rs3824259) and c.-1493G>C – IDO1 (rs10089084)  |                           |           |                          |           |                     |          |
| CG                                                                | 62                        | 0.14      | 175                      | 0.41      | 4.083 (2.933-5.686) | <0.0001  |
| CC                                                                | 156                       | 0.36      | 43                       | 0.10      | 0.195 (0.134-0.282) | <0.0001  |
| AG                                                                | 96                        | 0.22      | 109                      | 0.25      | 1.182(0.863-1.618)  | 0.298    |
| AC                                                                | 114                       | 0.27      | 101                      | 0.24      | 0.851 (0.624-1.159) | 0.306    |

**Table 2.** Gene-gene interactions of studied polymorphisms and the risk of stroke.

| Combined genotype                                               | Control ( <i>n</i> = 107) |           | Stroke ( <i>n</i> = 107) |           | Crude OR (95% CI)         | <i>p</i> |
|-----------------------------------------------------------------|---------------------------|-----------|--------------------------|-----------|---------------------------|----------|
|                                                                 | Number                    | Frequency | Number                   | Frequency |                           |          |
| c.804-7C>A – TPH1 (rs1799913) and c.-844G>T – TPH2 (rs4570625)  |                           |           |                          |           |                           |          |
| C/C-G/G                                                         | 3                         | 0.028     | 21                       | 0.196     | 8.465 (2.442 – 29.340)    | <0.001   |
| C/C-G/T                                                         | 20                        | 0.187     | 14                       | 0.131     | 0.655 (0.312 – 1.377)     | 0.264    |
| C/C-T/T                                                         | 0                         | 0         | 0                        | 0         | -                         | -        |
| C/A-G/G                                                         | 3                         | 0.028     | 4                        | 0.037     | 1.346 (0.294 – 6.165)     | 0.702    |
| C/A-G/T                                                         | 52                        | 0.486     | 1                        | 0.009     | 0.010 (0.001 – 0.074)     | <0.001   |
| C/A-T/T                                                         | 2                         | 0.019     | 0                        | 0         | -                         | -        |
| A/A-G/G                                                         | 2                         | 0.019     | 53                       | 0.495     | 51.528 (12.093 – 219.550) | <0.001   |
| A/A-G/T                                                         | 25                        | 0.234     | 14                       | 0.131     | 0.494 (0.241 – 1.013)     | 0.054    |
| A/A-T/T                                                         | 0                         | 0         | 0                        | 0         | -                         | -        |
| c.804-7C>A – TPH1 (rs1799913) and c.-1449C>A – TPH2 (rs7963803) |                           |           |                          |           |                           |          |
| C/C-C/C                                                         | 13                        | 0.121     | 31                       | 0.290     | 2.949 (1.443 – 6.027)     | 0.003    |
| C/C-C/A                                                         | 7                         | 0.065     | 0                        | 0         | -                         | -        |
| C/C-A/A                                                         | 3                         | 0.028     | 4                        | 0.037     | 1.346 (0.294 – 6.165)     | 0.702    |
| C/A-C/C                                                         | 36                        | 0.336     | 4                        | 0.037     | 0.077 (0.026 – 0.225)     | <0.001   |

|                                                                     |    |       |    |       |                          |        |
|---------------------------------------------------------------------|----|-------|----|-------|--------------------------|--------|
| C/A-C/A                                                             | 18 | 0.168 | 0  | 0     | -                        | -      |
| C/A-A/A                                                             | 3  | 0.028 | 1  | 0.009 | 0.327 (0.034 – 3.195)    | 0.337  |
| A/A-C/C                                                             | 16 | 0.150 | 63 | 0.589 | 8.143 (4.225 – 15.696)   | <0.001 |
| A/A-C/A                                                             | 9  | 0.084 | 1  | 0.009 | 0.103 (0.013 – 0.826)    | 0.032  |
| A/A-A/A                                                             | 2  | 0.019 | 3  | 0.028 | -                        | -      |
| c.803+221C>A – TPH1 ( rs1800532) and c.-844G>T – TPH2 ( rs4570625)  |    |       |    |       |                          |        |
| C/C-G/G                                                             | 3  | 0.028 | 26 | 0.243 | 11.128 (3.253 – 38.065)  | <0.001 |
| C/C-G/T                                                             | 20 | 0.187 | 15 | 0.140 | 0.709 (0.342 – 1.473)    | 0.357  |
| C/C-T/T                                                             | 0  | 0     | 0  | 0     | -                        | -      |
| C/A-G/G                                                             | 5  | 0.047 | 36 | 0.336 | 10.344 (3.870 – 27.650)  | <0.001 |
| C/A-G/T                                                             | 76 | 0.710 | 12 | 0.112 | 0.052 (0.025 – 0.107)    | <0.001 |
| C/A-T/T                                                             | 2  | 0.019 | 0  | 0     | -                        | -      |
| A/A-G/G                                                             | 0  | 0     | 16 | 0.150 | -                        | -      |
| A/A-G/T                                                             | 1  | 0.009 | 2  | 0.019 | 2.019 (0.180 – 22.606)   | 0.569  |
| A/A-T/T                                                             | 0  | 0     | 0  | 0     | -                        | -      |
| c.803+221C>A – TPH1 ( rs1800532) and c.-1449C>A – TPH2 ( rs7963803) |    |       |    |       |                          |        |
| C/C-C/C                                                             | 16 | 0.150 | 36 | 0.336 | 2.884 (1.482 – 5.611)    | 0.002  |
| C/C-C/A                                                             | 6  | 0.056 | 0  | 0     | -                        | -      |
| C/C-A/A                                                             | 1  | 0.009 | 5  | 0.047 | 5.196 (0.597 – 45.244)   | 0.136  |
| C/A-C/C                                                             | 48 | 0.449 | 46 | 0.430 | 0.972 (0.540 – 1.591)    | 0.783  |
| C/A-C/A                                                             | 28 | 0.262 | 1  | 0.009 | 0.027 (0.004 – 0.200)    | <0.001 |
| C/A-A/A                                                             | 7  | 0.065 | 1  | 0.009 | 0.135 (0.016 – 1.115)    | 0.063  |
| A/A-C/C                                                             | 1  | 0.009 | 16 | 0.10  | 18.637 (2.424 – 143.277) | 0.005  |
| A/A-C/A                                                             | 0  | 0     | 0  | 0     | -                        | -      |
| A/A-A/A                                                             | 0  | 0     | 2  | 0.019 | -                        | -      |
| c.-173A>T – TPH1 ( rs10488682) and c.-844G>T – TPH2 ( rs4570625)    |    |       |    |       |                          |        |
| T/T-G/G                                                             | 3  | 0.028 | 50 | 0.467 | 30.409 (9.077 – 101.874) | <0.001 |
| T/T-G/T                                                             | 53 | 0.495 | 14 | 0.131 | 0.153 (0.078 – 0.302)    | <0.001 |
| T/T-T/T                                                             | 1  | 0.009 | 0  | 0     | -                        | -      |
| A/T-G/G                                                             | 5  | 0.047 | 27 | 0.252 | 6.885 (2.538 – 18.680)   | <0.001 |
| A/T-G/T                                                             | 41 | 0.383 | 13 | 0.121 | 0.223 (0.111 – 0.448)    | <0.001 |
| A/T-T/T                                                             | 1  | 0.009 | 0  | 0     | -                        | -      |
| A/A-G/G                                                             | 0  | 0     | 1  | 0.009 | -                        | -      |
| A/A-G/T                                                             | 3  | 0.028 | 2  | 0.019 | 0.660 (0.108 – 4.033)    | 0.653  |
| A/A-T/T                                                             | 0  | 0     | 0  | 0     | -                        | -      |
| c.-173A>T – TPH1 ( rs10488682) and c.-1449C>A – TPH2 ( rs7963803)   |    |       |    |       |                          |        |
| T/T-C/C                                                             | 30 | 0.280 | 58 | 0.542 | 3.038 (1.722 – 5.361)    | <0.001 |
| T/T-C/A                                                             | 19 | 0.178 | 0  | 0     | -                        | -      |
| T/T-A/A                                                             | 8  | 0.075 | 6  | 0.056 | 0.735 (0.246 – 2.196)    | 0.582  |
| A/T-C/C                                                             | 34 | 0.318 | 39 | 0.364 | 1.231 (0.699 – 2.169)    | 0.471  |
| A/T-C/A                                                             | 13 | 0.121 | 1  | 0.009 | 0.068 (0.009 – 0.531)    | 0.010  |
| A/T-A/A                                                             | 0  | 0     | 0  | 0     | -                        | -      |
| A/A-C/C                                                             | 1  | 0.009 | 1  | 0.009 | 1.000 (0.067 – 16.197)   | 1.000  |
| A/A-C/A                                                             | 2  | 0.019 | 0  | 0     | -                        | -      |
| A/A-A/A                                                             | 0  | 0     | 2  | 0.019 | -                        | -      |
| c.-1668T>A – TPH1 ( rs623580) and c.-844G>T – TPH2 ( rs4570625)     |    |       |    |       |                          |        |
| T/T-G/G                                                             | 2  | 0.019 | 18 | 0.168 | 10.618 (2.398 – 47.015)  | 0.002  |
| T/T-G/T                                                             | 50 | 0.467 | 4  | 0.037 | 0.044 (0.015 – 0.129)    | <0.001 |
| T/T-T/T                                                             | 1  | 0.009 | 0  | 0     | -                        | -      |
| T/A-G/G                                                             | 6  | 0.056 | 43 | 0.402 | 11.310 (4.554 – 28.090)  | <0.001 |
| T/A-G/T                                                             | 38 | 0.355 | 19 | 0.178 | 0.392 (0.208 – 0.739)    | 0.004  |
| T/A-T/T                                                             | 1  | 0.009 | 0  | 0     | -                        | -      |
| A/A-G/G                                                             | 0  | 0     | 17 | 0.159 | -                        | -      |
| A/A-G/T                                                             | 9  | 0.084 | 6  | 0.056 | 0.647 (0.222 – 1.885)    | 0.425  |
| A/A-T/T                                                             | 0  | 0     | 0  | 0     | -                        | -      |
| c.-1668T>A – TPH1 ( rs623580) and c.-1449C>A – TPH2 ( rs7963803)    |    |       |    |       |                          |        |
| T/T-C/C                                                             | 34 | 0.318 | 18 | 0.168 | 0.434 (0.227 – 0.832)    | 0.012  |
| T/T-C/A                                                             | 18 | 0.168 | 0  | 0     | -                        | -      |
| T/T-A/A                                                             | 1  | 0.009 | 4  | 0.037 | 4.117 (0.452 – 37.451)   | 0.209  |
| T/A-C/C                                                             | 25 | 0.234 | 57 | 0.533 | 3.739 (2.079 – 6.726)    | <0.001 |
| T/A-C/A                                                             | 16 | 0.150 | 1  | 0.009 | 0.053 (0.007 – 0.412)    | 0.005  |
| T/A-A/A                                                             | 4  | 0.037 | 4  | 0.037 | 1.000 (0.244 – 4.106)    | 1.000  |
| A/A-C/C                                                             | 6  | 0.056 | 23 | 0.215 | 4.609 (1.793 – 11.846)   | 0.002  |
| A/A-C/A                                                             | 0  | 0     | 0  | 0     | -                        | -      |
| A/A-A/A                                                             | 3  | 0.028 | 0  | 0     | -                        | -      |
| c.*456G>A (rs10988134) – KAT1 and c.-1849C>A – IDO1 (rs3824259)     |    |       |    |       |                          |        |

|                                                                               |    |              |           |              |                              |                  |
|-------------------------------------------------------------------------------|----|--------------|-----------|--------------|------------------------------|------------------|
| A/A-C/C                                                                       | 1  | 0.009        | 0         | 0            | -                            | -                |
| A/A-C/A                                                                       | 1  | 0.009        | 1         | 0.009        | 1.000 (0.062-16.197)         | 1.000            |
| A/A-A/A                                                                       | 3  | 0.028        | 0         | 0            | -                            | -                |
| A/G-C/C                                                                       | 6  | 0.056        | 9         | 0.084        | 1.546 (0.530-4.506)          | 0.425            |
| A/G-C/A                                                                       | 19 | 0.178        | 17        | 0.159        | 0.875 (0.427-1.792)          | 0.715            |
| A/G-A/A                                                                       | 10 | 0.093        | 11        | 0.013        | 1.111 (0.451-2.738)          | 0.818            |
| G/G-C/C                                                                       | 24 | 0.224        | 16        | 0.150        | 0.608 (0.302-1.223)          | 0.163            |
| G/G-C/A                                                                       | 27 | <b>0.252</b> | <b>41</b> | <b>0.383</b> | <b>1.841 (1.025-3.304)</b>   | <b>0.041</b>     |
| G/G-A/A                                                                       | 16 | 0.150        | 12        | 0.112        | 0.718 (0.322-1.602)          | 0.419            |
| c.975-7T>C- <i>KAT2</i> (rs1480544) and- c.-1849C>A <i>IDO1</i> (rs3824259)   |    |              |           |              |                              |                  |
| C/C-CC                                                                        | 9  | 0.084        | 16        | 0.150        | 1.915 (0.806-4.547)          | 0.141            |
| C/C-CA                                                                        | 14 | <b>0.131</b> | <b>42</b> | <b>0.393</b> | <b>4.292 (2.168-8.497)</b>   | <b>&lt;0.001</b> |
| C/C-AA                                                                        | 6  | 0.056        | 14        | 0.131        | 2.534 (0.935-6.868)          | 0.068            |
| T/C-CC                                                                        | 17 | 0.159        | 0         | 0            | -                            | -                |
| T/C-CA                                                                        | 26 | <b>0.243</b> | <b>1</b>  | <b>0.009</b> | <b>0.029 (0.004-0.221)</b>   | <b>&lt;0.001</b> |
| T/C-AA                                                                        | 16 | <b>0.150</b> | <b>3</b>  | <b>0.028</b> | <b>0.164 (0.046-0.581)</b>   | <b>0.005</b>     |
| T/T-CC                                                                        | 5  | 0.047        | 9         | 0.084        | 1.873 (0.607-5.787)          | 0.275            |
| T/T-CA                                                                        | 7  | 0.065        | 16        | 0.150        | 2.512 (0.989-6.382)          | 0.053            |
| T/T-AA                                                                        | 7  | 0.065        | 6         | 0.561        | 0.849 (0.276-2.614)          | 0.775            |
| c.-1493G>C - <i>IDO1</i> (rs10089084) and c.*456G>A- <i>KAT1</i> (rs10988134) |    |              |           |              |                              |                  |
| G/G-G/G                                                                       | 8  | <b>0.075</b> | <b>29</b> | <b>0.271</b> | <b>4.601 (1.992-10.626)</b>  | <b>&lt;0.001</b> |
| G/G-G/A                                                                       | 4  | <b>0.037</b> | <b>15</b> | <b>0.140</b> | <b>4.198 (1.345-13.104)</b>  | <b>0.013</b>     |
| G/G-A/A                                                                       | 0  | 0            | 0         | 0            | -                            | -                |
| G/C-G/G                                                                       | 35 | 0.327        | 37        | 0.346        | 1.087 (0.617-1.918)          | 0.772            |
| G/C-G/A                                                                       | 18 | 0.168        | 16        | 0.150        | 0.869 (0.417-1.811)          | 0.709            |
| G/C-A/A                                                                       | 2  | 0.190        | 1         | 0.009        | 0.495 (0.044-5.545)          | 0.569            |
| C/C-G/G                                                                       | 24 | <b>0.224</b> | <b>3</b>  | <b>0.028</b> | <b>0.100 (0.029-0.343)</b>   | <b>&lt;0.001</b> |
| C/C-G/A                                                                       | 13 | 0.121        | 6         | 0.056        | 0.430 (0.157-1.176)          | 0.100            |
| C/C-A/A                                                                       | 3  | 0.028        | 0         | 0            | -                            | -                |
| c.*456G>A- <i>KAT1</i> (rs10988134) and c.975-7T>C- <i>KAT2</i> (rs1480544)   |    |              |           |              |                              |                  |
| G/G-T/T                                                                       | 10 | 0.093        | 20        | 0.187        | 2.230 (0.990-5.025)          | 0.053            |
| G/G-T/C                                                                       | 41 | <b>0.383</b> | <b>2</b>  | <b>0.019</b> | <b>0.031 (0.007-0.131)</b>   | <b>&lt;0.001</b> |
| G/G-C/C                                                                       | 16 | <b>0.150</b> | <b>47</b> | <b>0.439</b> | <b>4.455 (2.316-8.571)</b>   | <b>&lt;0.001</b> |
| G/A-T/T                                                                       | 9  | 0.0841       | 11        | 0.103        | 1.248 (0.945-3.146)          | 0.639            |
| G/A-T/C                                                                       | 14 | <b>0.131</b> | <b>2</b>  | <b>0.019</b> | <b>0.127 (0.028-0.571)</b>   | <b>0.007</b>     |
| G/A-C/C                                                                       | 12 | <b>0.112</b> | <b>24</b> | <b>0.224</b> | <b>2.289 (1.078-4.860)</b>   | <b>0.031</b>     |
| A/A-T/T                                                                       | 0  | 0            | 0         | 0            | -                            | -                |
| A/A-T/C                                                                       | 4  | 0.037        | 0         | 0            | -                            | -                |
| A/A-C/C                                                                       | 1  | 0.009        | 1         | 0.009        | 1.000 (0.062-16.197)         | 1.000            |
| c.-1493G>C - <i>IDO1</i> (rs10089084) and c.975-7T>C- <i>KAT2</i> (rs1480544) |    |              |           |              |                              |                  |
| G/G-T/T                                                                       | 4  | <b>0.037</b> | <b>16</b> | <b>0.150</b> | <b>4.527 (1.461-14.035)</b>  | <b>0.009</b>     |
| G/G-T/C                                                                       | 6  | 0.056        | 1         | 0.009        | 0.159 (0.019-1.342)          | 0.091            |
| G/G-C/C                                                                       | 2  | <b>0.019</b> | <b>27</b> | <b>0.252</b> | <b>17.719 (4.092-76.715)</b> | <b>&lt;0.001</b> |
| G/C-T/T                                                                       | 9  | 0.084        | 14        | 0.131        | 1.639 (0.677-3.968)          | 0.273            |
| G/C-T/C                                                                       | 31 | <b>0.290</b> | <b>3</b>  | <b>0.028</b> | <b>0.071 (0.021-0.240)</b>   | <b>&lt;0.001</b> |
| G/C-C/C                                                                       | 15 | <b>0.140</b> | <b>37</b> | <b>0.346</b> | <b>3.242 (1.650-6.372)</b>   | <b>&lt;0.001</b> |
| C/C-T/T                                                                       | 6  | 0.056        | 1         | 0.009        | 0.159 (0.019-1.342)          | 0.091            |
| C/C-T/C                                                                       | 22 | 0.206        | 0         | 0            | -                            | -                |
| C/C-C/C                                                                       | 12 | 0.112        | 8         | 0.075        | 0.640 (0.250-1.634)          | 0.351            |
| c.-1849C>A - <i>IDO1</i> (rs3824259) and c.804-7C>A - <i>TPH1</i> (rs1799913) |    |              |           |              |                              |                  |
| C/C-C/C                                                                       | 8  | 0.075        | 10        | 0.093        | 1.276 (0.483-3.369)          | 0.623            |
| C/C-C/A                                                                       | 17 | <b>0.159</b> | <b>1</b>  | <b>0.009</b> | <b>0.050 (0.007-0.383)</b>   | <b>0.004</b>     |
| C/C-A/A                                                                       | 6  | 0.056        | 14        | 0.131        | 2.534 (0.935-6.868)          | 0.068            |
| C/A-C/C                                                                       | 9  | 0.084        | 18        | 0.168        | 2.202 (0.941-5.153)          | 0.069            |
| C/A-C/A                                                                       | 30 | <b>0.280</b> | <b>4</b>  | <b>0.037</b> | <b>0.100 (0.034-0.295)</b>   | <b>&lt;0.001</b> |
| C/A-A/A                                                                       | 8  | <b>0.075</b> | <b>37</b> | <b>0.346</b> | <b>6.541 (2.872-14.899)</b>  | <b>&lt;0.001</b> |
| A/A-C/C                                                                       | 6  | 0.056        | 7         | 0.065        | 1.178 (0.383-3.629)          | 0.775            |
| A/A-C/A                                                                       | 10 | 0.093        | 0         | 0            | -                            | -                |
| A/A-A/A                                                                       | 13 | 0.121        | 16        | 0.150        | 1.271 (0.579-2.792)          | 0.550            |
| c.-1849C>A - <i>IDO1</i> (rs3824259) and c.-844G>T - <i>TPH2</i> (rs4570625)  |    |              |           |              |                              |                  |
| C/C-G/G                                                                       | 5  | <b>0.047</b> | <b>20</b> | <b>0.187</b> | <b>4.690 (1.690-13.017)</b>  | <b>0.003</b>     |
| C/C-G/T                                                                       | 26 | <b>0.243</b> | <b>5</b>  | <b>0.047</b> | <b>0.153 (0.056-0.415)</b>   | <b>&lt;0.001</b> |
| C/C-T/T                                                                       | 0  | 0            | 0         | 0            | -                            | -                |

|                                                                    |    |       |    |       |                        |        |
|--------------------------------------------------------------------|----|-------|----|-------|------------------------|--------|
| C/A-G/G                                                            | 1  | 0.009 | 41 | 0.383 | 65.848 (8.846-490.165) | <0.001 |
| C/A-G/T                                                            | 44 | 0.411 | 18 | 0.168 | 0.290 (0.153-0.547)    | <0.001 |
| C/A-T/T                                                            | 2  | 0.019 | 0  | 0     | -                      | -      |
| A/A-G/G                                                            | 2  | 0.019 | 17 | 0.159 | 9.917 (2.231-44.088)   | 0.003  |
| A/A-G/T                                                            | 27 | 0.252 | 6  | 0.056 | 0.176 (0.069-0.447)    | <0.001 |
| A/A-T/T                                                            | 0  | 0     | 0  | 0     | -                      | -      |
| c. -1849C>A – IDO1 (rs3824259) and c.803+221C>A – TPH1 (rs1800532) |    |       |    |       |                        |        |
| C/C-C/C                                                            | 7  | 0.065 | 12 | 0.112 | 1.805 (0.682-4.777)    | 0.235  |
| C/C-C/A                                                            | 24 | 0.224 | 11 | 0.103 | 0.396 (0.183-0.857)    | 0.019  |
| C/C-A/A                                                            | 0  | 0     | 2  | 0.019 | -                      | -      |
| C/A-C/C                                                            | 10 | 0.093 | 22 | 0.206 | 2.511 (1.126-5.600)    | 0.025  |
| C/A-C/A                                                            | 37 | 0.346 | 29 | 0.271 | 0.703 (0.392-1.261)    | 0.237  |
| C/A-A/A                                                            | 0  | 0     | 8  | 0.075 | -                      | -      |
| A/A-C/C                                                            | 6  | 0.056 | 7  | 0.065 | 1.178 (0.383-3.629)    | 0.775  |
| A/A-C/A                                                            | 22 | 0.206 | 8  | 0.075 | 0.312 (0.132-0.737)    | 0.008  |
| A/A-A/A                                                            | 1  | 0.009 | 8  | 0.075 | 8.566 (1.052-69.727)   | 0.045  |
| c. -1849C>A – IDO1 (rs3824259) and c.-1449C>A – TPH2 (rs7963803)   |    |       |    |       |                        |        |
| C/C-C/C                                                            | 19 | 0.178 | 23 | 0.215 | 1.268 (0.644-2.496)    | 0.492  |
| C/C-C/A                                                            | 9  | 0.084 | 1  | 0.009 | 0.103 (0.013-0.826)    | 0.032  |
| C/C-A/A                                                            | 3  | 0.028 | 1  | 0.009 | 0.327 (0.034-3.195)    | 0.337  |
| C/A-C/C                                                            | 32 | 0.299 | 55 | 0.514 | 2.479 (1.414-4.345)    | 0.002  |
| C/A-C/A                                                            | 12 | 0.112 | 0  | 0     | -                      | -      |
| C/A-A/A                                                            | 3  | 0.028 | 4  | 0.037 | 1.346 (0.294-6.165)    | 0.702  |
| A/A-C/C                                                            | 14 | 0.131 | 20 | 0.187 | 1.527 (0.726-3.210)    | 0.264  |
| A/A-C/A                                                            | 13 | 0.121 | 0  | 0     | -                      | -      |
| A/A-A/A                                                            | 2  | 0.019 | 3  | 0.028 | 1.514 (0.248-9.250)    | 0.653  |
| c. -1849C>A – IDO1 (rs3824259) and c.-173A>T – TPH1 (rs10488682)   |    |       |    |       |                        |        |
| C/C-A/A                                                            | 1  | 0.009 | 1  | 0.009 | 1.000 (0.062-16.197)   | 1.000  |
| C/C-A/T                                                            | 12 | 0.112 | 11 | 0.103 | 0.907 (0.382-2.156)    | 0.825  |
| C/C-T/T                                                            | 18 | 0.168 | 13 | 0.121 | 0.684 (0.317-1.477)    | 0.333  |
| C/A-A/A                                                            | 1  | 0.009 | 0  | 0     | -                      | -      |
| C/A-A/T                                                            | 24 | 0.224 | 24 | 0.224 | 1.000 (0.526-1.901)    | 1.000  |
| C/A-T/T                                                            | 22 | 0.206 | 35 | 0.327 | 1.878 (1.012-3.487)    | 0.046  |
| A/A-A/A                                                            | 1  | 0.009 | 2  | 0.190 | 2.019 (0.180-22.606)   | 0.569  |
| A/A-A/T                                                            | 11 | 0.103 | 5  | 0.047 | 0.428 (0.143-1.277)    | 0.128  |
| A/A-T/T                                                            | 17 | 0.159 | 16 | 0.150 | 0.931 (0.443-1.955)    | 0.840  |
| c. -1849C>A – IDO1 (rs3824259) and c.-1668T>A – TPH1 (rs623580)    |    |       |    |       |                        |        |
| C/C-T/T                                                            | 15 | 0.140 | 2  | 0.019 | 0.117 (0.026-0.524)    | 0.005  |
| C/C-T/A                                                            | 12 | 0.112 | 18 | 0.168 | 1.601 (0.730-3.512)    | 0.240  |
| C/C-A/A                                                            | 4  | 0.037 | 5  | 0.047 | 1.262 (0.330-4.835)    | 0.734  |
| C/A-T/T                                                            | 22 | 0.206 | 10 | 0.093 | 0.398 (0.179-0.888)    | 0.028  |
| C/A-T/A                                                            | 22 | 0.206 | 36 | 0.336 | 1.959 (1.057-3.631)    | 0.033  |
| C/A-A/A                                                            | 3  | 0.028 | 13 | 0.121 | 4.794 (1.325-17.347)   | 0.017  |
| A/A-T/T                                                            | 16 | 0.150 | 10 | 0.093 | 0.586 (0.253-1.359)    | 0.213  |
| A/A-T/A                                                            | 11 | 0.103 | 8  | 0.075 | 0.705 (0.272-1.829)    | 0.473  |
| A/A-A/A                                                            | 2  | 0.019 | 5  | 0.047 | 2.574 (0.488-13.566)   | 0.265  |
| c. -1493G>C – IDO1 (rs10089084) and c.804-7C>A – TPH1 (rs1799913)  |    |       |    |       |                        |        |
| G/G-C/C                                                            | 1  | 0.009 | 18 | 0.168 | 21.438 (2.806-163.770) | 0.003  |
| G/G-C/A                                                            | 5  | 0.047 | 0  | 0     | -                      | -      |
| G/G-A/A                                                            | 6  | 0.056 | 26 | 0.243 | 5.403 (2.122-13.758)   | <0.001 |
| G/C-C/C                                                            | 12 | 0.112 | 14 | 0.131 | 1.192 (0.524-2.712)    | 0.676  |
| G/C-C/A                                                            | 31 | 0.290 | 5  | 0.047 | 0.120 (0.045-0.323)    | <0.001 |
| G/C-A/A                                                            | 12 | 0.112 | 35 | 0.327 | 3.848 (1.866-7.935)    | <0.001 |
| C/C-C/C                                                            | 10 | 0.093 | 3  | 0.028 | 0.280 (0.075-1.047)    | 0.059  |
| C/C-C/A                                                            | 21 | 0.196 | 0  | 0     | -                      | -      |
| C/C-A/A                                                            | 9  | 0.084 | 6  | 0.056 | 0.647 (0.222-1.885)    | 0.425  |
| c. -1493G>C – IDO1 (rs10089084) and c.-844G>T – TPH2 (rs4570625)   |    |       |    |       |                        |        |
| G/G-G/G                                                            | 0  | 0     | 32 | 0.299 | -                      | -      |
| G/G-G/T                                                            | 12 | 0.112 | 12 | 0.112 | 1.000 (0.428-2.338)    | 1.000  |
| G/G-T/T                                                            | 0  | 0     | 0  | 0     | -                      | -      |
| G/C-G/G                                                            | 5  | 0.047 | 40 | 0.374 | 12.179 (4.573-32.433)  | <0.001 |
| G/C-G/T                                                            | 49 | 0.458 | 14 | 0.131 | 0.178 (0.091-0.351)    | <0.001 |
| G/C-T/T                                                            | 1  | 0.009 | 0  | 0     | -                      | -      |

|                                                                                   |           |              |           |               |                               |                  |
|-----------------------------------------------------------------------------------|-----------|--------------|-----------|---------------|-------------------------------|------------------|
| C/C-G/G                                                                           | 3         | 0.028        | 6         | 0.056         | 2.059 (0.501-8.458)           | 0.316            |
| <b>C/C-G/T</b>                                                                    | <b>36</b> | <b>0.336</b> | <b>3</b>  | <b>0.028</b>  | <b>0.057 (0.017-0.192)</b>    | <b>&lt;0.001</b> |
| C/C-T/T                                                                           | 1         | 0.009        | 0         | 0             | -                             | -                |
| c. -1493G>C – <i>IDO1</i> (rs10089084) and c.803+221C>A – <i>TPH1</i> (rs1800532) |           |              |           |               |                               |                  |
| <b>G/G-C/C</b>                                                                    | <b>1</b>  | <b>0.009</b> | <b>19</b> | <b>0.178</b>  | <b>22.886 (3.004-174.371)</b> | <b>0.003</b>     |
| <b>G/G-C/A</b>                                                                    | <b>11</b> | <b>0.103</b> | <b>22</b> | <b>0.206</b>  | <b>2.259 (1.035-4.930)</b>    | <b>0.041</b>     |
| G/G-A/A                                                                           | 0         | 0            | 3         | 0.028         | -                             | -                |
| G/C-C/C                                                                           | 11        | 0.103        | 19        | 0.178         | 1.884 (0.849-4.181)           | 0.119            |
| <b>G/C-C/A</b>                                                                    | <b>44</b> | <b>0.411</b> | <b>24</b> | <b>0.224</b>  | <b>0.414 (0.228-0.751)</b>    | <b>0.004</b>     |
| G/C-A/A                                                                           | 0         | 0            | 11        | 0.103         | -                             | -                |
| <b>C/C-C/C</b>                                                                    | <b>11</b> | <b>0.103</b> | <b>3</b>  | <b>0.028</b>  | <b>0.252 (0.068-0.930)</b>    | <b>0.039</b>     |
| <b>C/C-C/A</b>                                                                    | <b>28</b> | <b>0.262</b> | <b>2</b>  | <b>0.019</b>  | <b>0.054 (0.012-0.232)</b>    | <b>&lt;0.001</b> |
| C/C-A/A                                                                           | 1         | 0.009        | 4         | 0.037         | 4.117 (0.452-37.451)          | 0.209            |
| c. -1493G>C – <i>IDO1</i> (rs10089084) and c.-1449C>A – <i>TPH2</i> (rs7963803)   |           |              |           |               |                               |                  |
| <b>G/G-C/C</b>                                                                    | <b>7</b>  | <b>0.065</b> | <b>41</b> | <b>0.383</b>  | <b>8.874 (3.756-20.966)</b>   | <b>&lt;0.001</b> |
| G/G-C/A                                                                           | 3         | 0.028        | 1         | 0.009         | 0.327 (0.034-3.195)           | 0.337            |
| G/G-A/A                                                                           | 2         | 0.019        | 2         | 0.019         | 1.000 (0.138-7.232)           | 1.000            |
| <b>G/C-C/C</b>                                                                    | <b>28</b> | <b>0.262</b> | <b>48</b> | <b>0.449</b>  | <b>2.295 (1.291-4.080)</b>    | <b>0.005</b>     |
| G/C-C/A                                                                           | 23        | 0.215        | 0         | 0             | -                             | -                |
| G/C-A/A                                                                           | 4         | 0.037        | 6         | 0.056         | 1.530 (0.419-5.583)           | 0.520            |
| <b>C/C-C/C</b>                                                                    | <b>30</b> | <b>0.280</b> | <b>9</b>  | <b>0.084</b>  | <b>0.236 (0.106-0.526)</b>    | <b>&lt;0.001</b> |
| C/C-C/A                                                                           | 8         | 0.075        | 0         | 0             | -                             | -                |
| C/C-A/A                                                                           | 2         | 0.019        | 0         | 0             | -                             | -                |
| c. -1493G>C – <i>IDO1</i> (rs10089084) and c.-173A>T – <i>TPH1</i> (rs10488682)   |           |              |           |               |                               |                  |
| G/G-A/A                                                                           | 0         | 0            | 3         | 0.028         | -                             | -                |
| <b>G/G-A/T</b>                                                                    | <b>4</b>  | <b>0.037</b> | <b>20</b> | <b>0.187</b>  | <b>5.920 (1.949-17.976)</b>   | <b>0.002</b>     |
| <b>G/G-T/T</b>                                                                    | <b>8</b>  | <b>0.075</b> | <b>21</b> | <b>0.196</b>  | <b>3.022 (1.274-7.170)</b>    | <b>0.012</b>     |
| G/C-A/A                                                                           | 2         | 0.019        | 0         | 0             | -                             | -                |
| G/C-A/T                                                                           | 26        | 0.243        | 17        | 0.159         | 0.588 (0.298-1.163)           | 0.127            |
| G/C-T/T                                                                           | 27        | 0.252        | 37        | 0.346         | 1.566 (0.867-2.827)           | 0.137            |
| C/C-A/A                                                                           | 1         | 0.009        | 0         | 0             | -                             | -                |
| <b>C/C-A/T</b>                                                                    | <b>17</b> | <b>0.159</b> | <b>3</b>  | <b>0.028</b>  | <b>0.153 (0.043-0.538)</b>    | <b>0.003</b>     |
| <b>C/C-T/T</b>                                                                    | <b>22</b> | <b>0.206</b> | <b>6</b>  | <b>0.056</b>  | <b>0.230 (0.089-0.592)</b>    | <b>0.002</b>     |
| c. -1493G>C – <i>IDO1</i> (rs10089084) and c.-1668T>A – <i>TPH1</i> (rs623580)    |           |              |           |               |                               |                  |
| G/G-T/T                                                                           | 7         | 0.065        | 5         | 0.047         | 0.700 (0.215-2.280)           | 0.554            |
| <b>G/G-T/A</b>                                                                    | <b>5</b>  | <b>0.047</b> | <b>30</b> | <b>0.280</b>  | <b>7.948 (2.948-21.431)</b>   | <b>&lt;0.001</b> |
| G/G-A/A                                                                           | 0         | 0            | 9         | 0.084         | -                             | -                |
| <b>G/C-T/T</b>                                                                    | <b>28</b> | <b>0.262</b> | <b>13</b> | <b>0.121</b>  | <b>0.390 (0.189-0.804)</b>    | <b>0.011</b>     |
| G/C-T/A                                                                           | 22        | 0.206        | 30        | 0.280         | 1.505 (0.801-2.828)           | 0.204            |
| G/C-A/A                                                                           | 5         | 0.047        | 11        | 0.103         | 2.337 (0.783-6.975)           | 0.128            |
| <b>C/C-T/T</b>                                                                    | <b>18</b> | <b>0.268</b> | <b>4</b>  | <b>0.037</b>  | <b>0.192 (0.063-0.588)</b>    | <b>0.004</b>     |
| <b>C/C-T/A</b>                                                                    | <b>18</b> | <b>0.268</b> | <b>2</b>  | <b>0.019</b>  | <b>0.094 (0.021-0.417)</b>    | <b>0.002</b>     |
| C/C-A/A                                                                           | 4         | 0.037        | 3         | 0.028         | 0.743 (0.162-3.401)           | 0.702            |
| c.*456G>A (rs10988134) – <i>KAT1</i> and c.804-7C>A – <i>TPH1</i> (rs1799913)     |           |              |           |               |                               |                  |
| G/G-C/C                                                                           | 17        | 0.159        | 19        | 0.178         | 1.143 (0.558-2.342)           | 0.715            |
| <b>G/G-C/A</b>                                                                    | <b>34</b> | <b>0.318</b> | <b>4</b>  | <b>0.037</b>  | <b>0.083 (0.028-0.245)</b>    | <b>&lt;0.001</b> |
| <b>G/G-A/A</b>                                                                    | <b>16</b> | <b>0.150</b> | <b>46</b> | <b>0.430</b>  | <b>4.289 (2.228-8.255)</b>    | <b>&lt;0.001</b> |
| <b>G/A-C/C</b>                                                                    | <b>5</b>  | <b>0.047</b> | <b>16</b> | <b>0.150</b>  | <b>3.587 (1.264-10.180)</b>   | <b>0.016</b>     |
| <b>G/A-C/A</b>                                                                    | <b>21</b> | <b>0.196</b> | <b>1</b>  | <b>0.009</b>  | <b>0.039 (0.005-0.293)</b>    | <b>0.002</b>     |
| <b>G/A-A/A</b>                                                                    | <b>9</b>  | <b>0.084</b> | <b>20</b> | <b>0.1987</b> | <b>2.503 (1.083-5.787)</b>    | <b>0.032</b>     |
| A/A-C/C                                                                           | 1         | 0.009        | 0         | 0             | -                             | -                |
| A/A-C/A                                                                           | 2         | 0.019        | 0         | 0             | -                             | -                |
| A/A-A/A                                                                           | 2         | 0.019        | 1         | 0.009         | 0.495 (0.044-5.545)           | 0.569            |
| c.*456G>A (rs10988134) – <i>KAT1</i> and c.-844G>T – <i>TPH2</i> (rs4570625)      |           |              |           |               |                               |                  |
| <b>G/G-G/G</b>                                                                    | <b>8</b>  | <b>0.075</b> | <b>51</b> | <b>0.477</b>  | <b>11.270 (4.993-25.440)</b>  | <b>&lt;0.001</b> |
| <b>G/G-G/T</b>                                                                    | <b>58</b> | <b>0.542</b> | <b>18</b> | <b>0.168</b>  | <b>0.171 (0.091-0.322)</b>    | <b>&lt;0.001</b> |
| G/G-T/T                                                                           | 1         | 0.009        | 0         | 0             | -                             | -                |
| G/A-G/G                                                                           | 0         | 0            | 26        | 0.243         | -                             | -                |
| <b>G/A-G/T</b>                                                                    | <b>34</b> | <b>0.318</b> | <b>11</b> | <b>0.103</b>  | <b>0.246 (0.117-0.518)</b>    | <b>&lt;0.001</b> |
| G/A-T/T                                                                           | 1         | 0.009        | 0         | 0             | -                             | -                |
| A/A-G/G                                                                           | 0         | 0            | 1         | 0.009         | -                             | -                |
| A/A-G/T                                                                           | 5         | 0.047        | 0         | 0             | -                             | -                |
| A/A-T/T                                                                           | 0         | 0            | 0         | 0             | -                             | -                |

| c.*456G>A (rs10988134) – <i>KAT1</i> and c.803+221C>A – <i>TPH1</i> (rs1800532) |           |              |           |              |                               |                  |
|---------------------------------------------------------------------------------|-----------|--------------|-----------|--------------|-------------------------------|------------------|
| G/G-C/C                                                                         | 16        | 0.150        | 22        | 0.206        | 1.472 (0.725-2.990)           | 0.285            |
| <b>G/G-C/A</b>                                                                  | <b>50</b> | <b>0.467</b> | <b>34</b> | <b>0.318</b> | <b>0.531 (0.304-0.926)</b>    | <b>0.026</b>     |
| <b>G/G-A/A</b>                                                                  | <b>1</b>  | <b>0.009</b> | <b>13</b> | <b>0.121</b> | <b>14.660 (1.882-114.195)</b> | <b>0.010</b>     |
| <b>G/A-C/C</b>                                                                  | <b>6</b>  | <b>0.056</b> | <b>18</b> | <b>0.168</b> | <b>3.404 (1.295-8.953)</b>    | <b>0.013</b>     |
| <b>G/A-C/A</b>                                                                  | <b>29</b> | <b>0.271</b> | <b>14</b> | <b>0.131</b> | <b>0.405 (0.200-0.820)</b>    | <b>0.012</b>     |
| G/A-A/A                                                                         | 0         | 0            | 5         | 0.047        | -                             | -                |
| A/A-C/C                                                                         | 1         | 0.009        | 1         | 0.009        | 1.000 (0.062-16.197)          | 1.000            |
| A/A-C/A                                                                         | 4         | 0.037        | 0         | 0            | -                             | -                |
| A/A-A/A                                                                         | 0         | 0            | 0         | 0            | -                             | -                |
| c.*456G>A (rs10988134) – <i>KAT1</i> and c.-1449C>A – <i>TPH2</i> (rs7963803)   |           |              |           |              |                               |                  |
| <b>G/G-C/C</b>                                                                  | <b>38</b> | <b>0.355</b> | <b>60</b> | <b>0.561</b> | <b>2.318 (1.337-4.018)</b>    | <b>0.003</b>     |
| <b>G/G-C/A</b>                                                                  | <b>26</b> | <b>0.243</b> | <b>1</b>  | <b>0.009</b> | <b>0.029 (0.004-0.221)</b>    | <b>&lt;0.001</b> |
| G/G-A/A                                                                         | 3         | 0.028        | 8         | 0.075        | 2.801 (0.722-10.862)          | 0.136            |
| <b>G/A-C/C</b>                                                                  | <b>23</b> | <b>0.215</b> | <b>37</b> | <b>0.346</b> | <b>1.930 (1.049-3.551)</b>    | <b>0.034</b>     |
| G/A-C/A                                                                         | 8         | 0.075        | 0         | 0            | -                             | -                |
| G/A-A/A                                                                         | 4         | 0.037        | 0         | 0            | -                             | -                |
| A/A-C/C                                                                         | 4         | 0.037        | 1         | 0.009        | 0.243 (0.027-2.210)           | 0.209            |
| A/A-C/A                                                                         | 0         | 0            | 0         | 0            | -                             | -                |
| A/A-A/A                                                                         | 1         | 0.009        | 0         | 0            | -                             | -                |
| c.*456G>A (rs10988134) – <i>KAT1</i> and c.-173A>T – <i>TPH1</i> (rs10488682)   |           |              |           |              |                               |                  |
| G/G-A/A                                                                         | 32        | 0.299        | 42        | 0.393        | 1.514 (0.859-2.671)           | 0.152            |
| G/G-A/T                                                                         | 33        | 0.308        | 25        | 0.234        | 0.684 (0.372-1.255)           | 0.220            |
| G/G-T/T                                                                         | 2         | 0.019        | 2         | 0.019        | 1.000 (0.138-7.232)           | 1.000            |
| G/A-A/A                                                                         | 22        | 0.206        | 21        | 0.196        | 0.943 (0.483-1.842)           | 0.865            |
| G/A-A/T                                                                         | 12        | 0.112        | 15        | 0.140        | 1.291 (0.573-2.906)           | 0.538            |
| G/A-T/T                                                                         | 1         | 0.009        | 1         | 0.009        | 1.000 (0.062-16.197)          | 1.000            |
| A/A-A/A                                                                         | 3         | 0.028        | 1         | 0.009        | 0.327 (0.034-3.195)           | 0.337            |
| A/A-A/T                                                                         | 2         | 0.019        | 0         | 0            | -                             | -                |
| A/A-T/T                                                                         | 0         | 0            | 0         | 0            | -                             | -                |
| c.*456G>A (rs10988134) – <i>KAT1</i> and c.-1668T>A – <i>TPH1</i> (rs623580)    |           |              |           |              |                               |                  |
| <b>G/G-T/T</b>                                                                  | <b>37</b> | <b>0.346</b> | <b>16</b> | <b>0.150</b> | <b>0.333 (0.171-0.646)</b>    | <b>0.001</b>     |
| <b>G/G-T/A</b>                                                                  | <b>27</b> | <b>0.252</b> | <b>44</b> | <b>0.411</b> | <b>2.069 (1.156-3.703)</b>    | <b>0.014</b>     |
| G/G-A/A                                                                         | 3         | 0.028        | 9         | 0.084        | 3.184 (0.873-12.104)          | 0.089            |
| <b>G/A-T/T</b>                                                                  | <b>15</b> | <b>0.140</b> | <b>5</b>  | <b>0.047</b> | <b>0.301 (0.105-0.860)</b>    | <b>0.025</b>     |
| G/A-T/A                                                                         | 14        | 0.131        | 18        | 0.168        | 1.343 (0.631-2.863)           | 0.444            |
| G/A-A/A                                                                         | 6         | 0.056        | 14        | 0.130        | 2.534 (0.935-6.868)           | 0.068            |
| A/A-T/T                                                                         | 1         | 0.009        | 1         | 0.009        | 1.000 (0.062-16.197)          | 1.000            |
| A/A-T/A                                                                         | 4         | 0.037        | 0         | 0            | -                             | -                |
| A/A-A/A                                                                         | 0         | 0            | 0         | 0            | -                             | -                |
| c.975-7T>C– <i>KAT2</i> (rs1480544) and c.804-7C>A – <i>TPH1</i> (rs1799913)    |           |              |           |              |                               |                  |
| T/T-C/C                                                                         | 3         | 0.028        | 9         | 0.084        | 3.184 (0.837-12.104)          | 0.089            |
| T/T-C/A                                                                         | 12        | 0.112        | 0         | 0            | -                             | -                |
| <b>T/T-A/A</b>                                                                  | <b>4</b>  | <b>0.037</b> | <b>22</b> | <b>0.206</b> | <b>6.665 (2.211-20.090)</b>   | <b>&lt;0.001</b> |
| T/C-C/C                                                                         | 16        | 0.150        | 0         | 0            | -                             | -                |
| T/C-C/A                                                                         | 32        | 0.299        | 0         | 0            | -                             | -                |
| T/C-A/A                                                                         | 11        | 0.103        | 4         | 0.037        | 0.339 (0.104-1.100)           | 0.072            |
| <b>C/C-C/C</b>                                                                  | <b>4</b>  | <b>0.037</b> | <b>26</b> | <b>0.243</b> | <b>8.265 (2.773-24.637)</b>   | <b>&lt;0.001</b> |
| C/C-C/A                                                                         | 13        | 0.121        | 5         | 0.047        | 0.354 (0.122-1.032)           | 0.057            |
| <b>C/C-A/A</b>                                                                  | <b>12</b> | <b>0.112</b> | <b>41</b> | <b>0.383</b> | <b>4.918 (2.404-10.062)</b>   | <b>&lt;0.001</b> |
| c.975-7T>C– <i>KAT2</i> (rs1480544) and c.-844G>T – <i>TPH2</i> (rs4570625)     |           |              |           |              |                               |                  |
| <b>T/T-G/G</b>                                                                  | <b>1</b>  | <b>0.009</b> | <b>24</b> | <b>0.224</b> | <b>30.651 (4.062-231.263)</b> | <b>&lt;0.001</b> |
| <b>T/T-G/T</b>                                                                  | <b>17</b> | <b>0.159</b> | <b>7</b>  | <b>0.065</b> | <b>0.371 (0.147-0.935)</b>    | <b>0.035</b>     |
| T/T-T/T                                                                         | 1         | 0.009        | 0         | 0            | -                             | -                |
| T/C-G/G                                                                         | 4         | 0.037        | 4         | 0.037        | 1.000 (0.244-4.106)           | 1.000            |
| T/C-G/T                                                                         | 55        | 0.514        | 0         | 0            | -                             | -                |
| T/C-T/T                                                                         | 0         | 0            | 0         | 0            | -                             | -                |
| <b>C/C-G/G</b>                                                                  | <b>3</b>  | <b>0.028</b> | <b>50</b> | <b>0.467</b> | <b>30.409 (9.077-101.874)</b> | <b>&lt;0.001</b> |
| C/C-G/T                                                                         | 25        | 0.234        | 22        | 0.206        | 0.849 (0.444-1.623)           | 0.621            |
| C/C-T/T                                                                         | 1         | 0.009        | 0         | 0            | -                             | -                |
| c.975-7T>C– <i>KAT2</i> (rs1480544) and c.803+221C>A – <i>TPH1</i> (rs1800532)  |           |              |           |              |                               |                  |
| T/T-C/C                                                                         | 3         | 0.028        | 10        | 0.093        | 3.574 (0.955-13.372)          | 0.059            |
| T/T-C/A                                                                         | 16        | 0.150        | 13        | 0.121        | 0.787 (0.358-1.727)           | 0.550            |

|                                                                              |           |              |           |              |                               |                  |
|------------------------------------------------------------------------------|-----------|--------------|-----------|--------------|-------------------------------|------------------|
| T/T-A/A                                                                      | 0         | 0            | 8         | 0.075        | -                             | -                |
| T/C-C/C                                                                      | 16        | 0.150        | 0         | 0            | -                             | -                |
| <b>T/C-C/A</b>                                                               | <b>42</b> | <b>0.393</b> | <b>3</b>  | <b>0.028</b> | <b>0.045 (0.013-0.150)</b>    | <b>&lt;0.001</b> |
| T/C-A/A                                                                      | 1         | 0.009        | 1         | 0.009        | 1.000 (0.062-16.197)          | 1.000            |
| <b>C/C-C/C</b>                                                               | <b>4</b>  | <b>0.037</b> | <b>31</b> | <b>0.290</b> | <b>10.503 (3.557-31.011)</b>  | <b>&lt;0.001</b> |
| C/C-C/A                                                                      | 25        | 0.234        | 32        | 0.299        | 1.399 (0.761-2.575)           | 0.280            |
| C/C-A/A                                                                      | 0         | 0            | 9         | 0.084        | -                             | -                |
| c.975-7T>C- <i>KAT2</i> (rs1480544) and c.-1449C>A - <i>TPH2</i> (rs7963803) |           |              |           |              |                               |                  |
| <b>T/T-C/C</b>                                                               | <b>10</b> | <b>0.093</b> | <b>27</b> | <b>0.252</b> | <b>3.274 (1.495-7.167)</b>    | <b>0.003</b>     |
| T/T-C/A                                                                      | 7         | 0.065        | 0         | 0            | -                             | -                |
| T/T-A/A                                                                      | 2         | 0.019        | 4         | 0.037        | 2.039 (0.365-11.375)          | 0.417            |
| <b>T/C-C/C</b>                                                               | <b>41</b> | <b>0.383</b> | <b>4</b>  | <b>0.037</b> | <b>0.063 (0.021-0.183)</b>    | <b>&lt;0.001</b> |
| T/C-C/A                                                                      | 15        | 0.140        | 0         | 0            | -                             | -                |
| T/C-A/A                                                                      | 3         | 0.028        | 0         | 0            | -                             | -                |
| <b>C/C-C/C</b>                                                               | <b>14</b> | <b>0.131</b> | <b>67</b> | <b>0.626</b> | <b>11.127 1.070)</b>          | <b>&lt;0.001</b> |
| <b>C/C-C/A</b>                                                               | <b>12</b> | <b>0.112</b> | <b>1</b>  | <b>0.009</b> | <b>0.075 (0.010-0.585)</b>    | <b>0.014</b>     |
| C/C-A/A                                                                      | 3         | 0.028        | 4         | 0.037        | 1.346 (0.294-6.165)           | 0.702            |
| c.975-7T>C- <i>KAT2</i> (rs1480544) and c.-173A>T - <i>TPH1</i> (rs10488682) |           |              |           |              |                               |                  |
| T/T-A/A                                                                      | 1         | 0.009        | 2         | 0.019        | 2.019 (0.180-22.606)          | 0.569            |
| T/T-A/T                                                                      | 5         | 0.047        | 2         | 0.019        | 0.389 (0.074-2.048)           | 0.265            |
| <b>T/T-T/T</b>                                                               | <b>13</b> | <b>0.121</b> | <b>27</b> | <b>0.252</b> | <b>2.440 (1.181-5.042)</b>    | <b>0.016</b>     |
| T/C-A/A                                                                      | 2         | 0.019        | 0         | 0            | -                             | -                |
| T/C-A/T                                                                      | 32        | 0.299        | 0         | 0            | -                             | -                |
| <b>T/C-T/T</b>                                                               | <b>25</b> | <b>0.234</b> | <b>4</b>  | <b>0.037</b> | <b>0.127 (0.043-0.381)</b>    | <b>&lt;0.001</b> |
| C/C-A/A                                                                      | 0         | 0            | 1         | 0.009        | -                             | -                |
| <b>C/C-A/T</b>                                                               | <b>10</b> | <b>0.093</b> | <b>38</b> | <b>0.355</b> | <b>5.342 (2.494-11.445)</b>   | <b>&lt;0.001</b> |
| <b>C/C-T/T</b>                                                               | <b>19</b> | <b>0.178</b> | <b>33</b> | <b>0.308</b> | <b>2.065 (1.085-3.931)</b>    | <b>0.027</b>     |
| c.975-7T>C- <i>KAT2</i> (rs1480544) and c.-1668T>A - <i>TPH1</i> (rs623580)  |           |              |           |              |                               |                  |
| T/T-T/T                                                                      | 10        | 0.093        | 11        | 0.103        | 1.111 (0.451-2.738)           | 0.818            |
| <b>T/T-T/A</b>                                                               | <b>7</b>  | <b>0.065</b> | <b>19</b> | <b>0.178</b> | <b>3.084 (1.238-7.683)</b>    | <b>0.016</b>     |
| T/T-A/A                                                                      | 2         | 0.019        | 1         | 0.009        | 0.495 (0.044-5.545)           | 0.569            |
| <b>T/C-T/T</b>                                                               | <b>28</b> | <b>0.261</b> | <b>1</b>  | <b>0.009</b> | <b>0.027 (0.004-0.200)</b>    | <b>&lt;0.001</b> |
| <b>T/C-T/A</b>                                                               | <b>25</b> | <b>0.234</b> | <b>3</b>  | <b>0.028</b> | <b>0.095 (0.028-0.324)</b>    | <b>&lt;0.001</b> |
| T/C-A/A                                                                      | 6         | 0.056        | 0         | 0            | -                             | -                |
| C/C-T/T                                                                      | 15        | 0.140        | 10        | 0.093        | 0.623 (0.270-1.479)           | 0.290            |
| <b>C/C-T/A</b>                                                               | <b>13</b> | <b>0.121</b> | <b>40</b> | <b>0.374</b> | <b>4.317 (2.144-8.691)</b>    | <b>&lt;0.001</b> |
| <b>C/C-A/A</b>                                                               | <b>1</b>  | <b>0.009</b> | <b>22</b> | <b>0.206</b> | <b>27.435 (3.624-207.693)</b> | <b>0.001</b>     |
